# Supplementary figures and images for: Anti-inflammatory effects of tripeptide WLS on TNF-α-induced HT-29 cells and DSS-induced colitis in mice
Source: Royal Society of Chemistry journal article supplement (doi:10.1039/d2fo01235a), 2022-01-01

NEG-POS-WLS

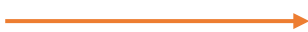

GAPDH

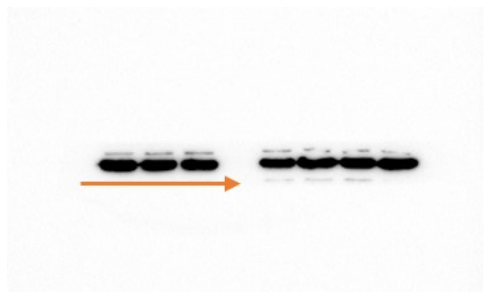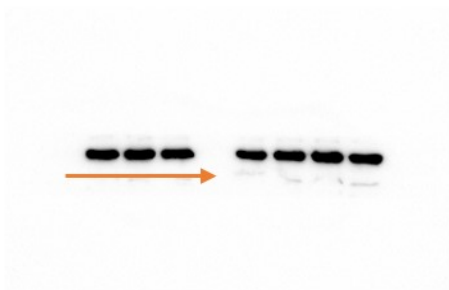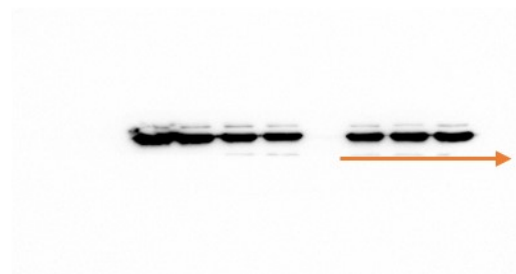

P38

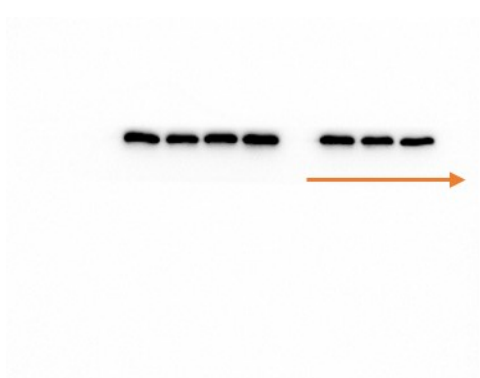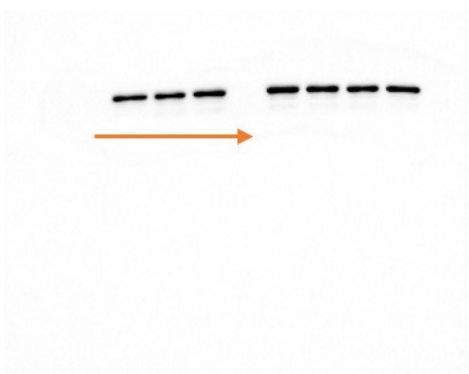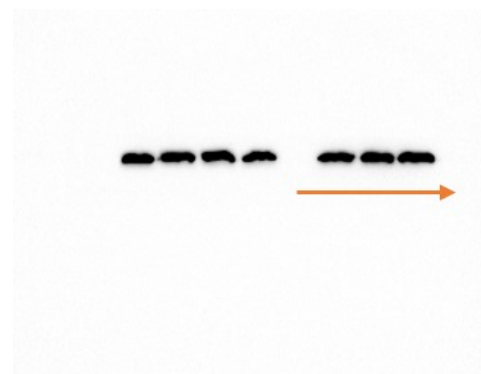

P-P38

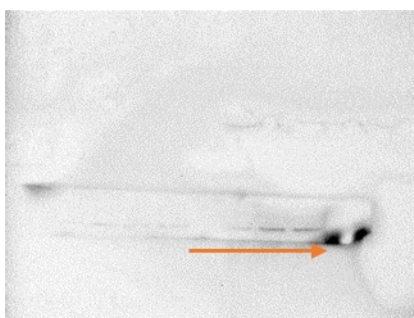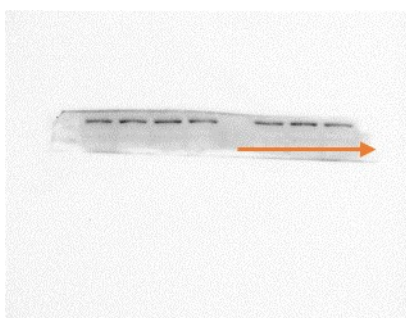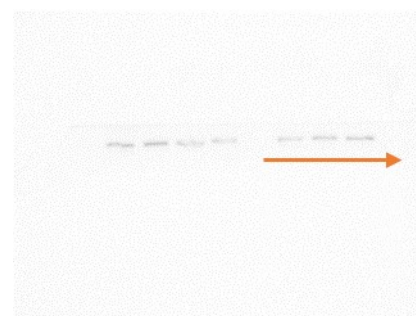

ERK

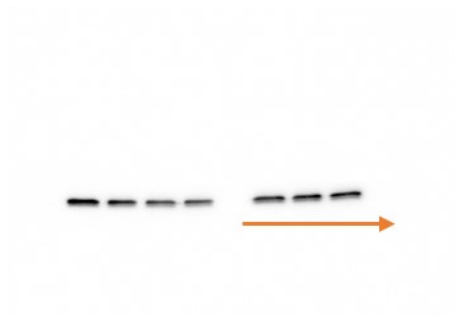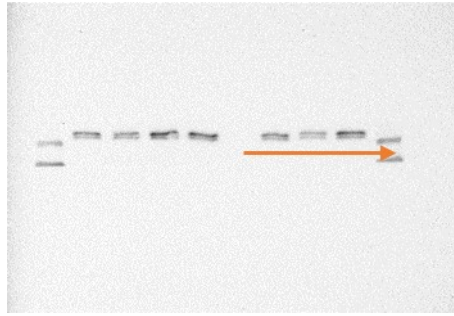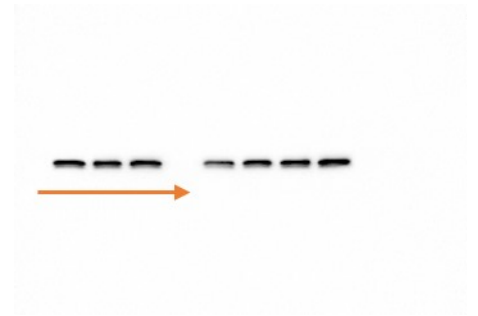

P-ERK

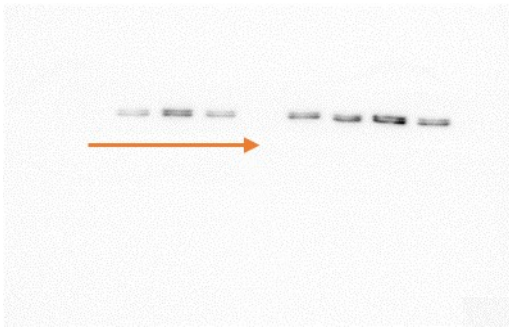

JNK

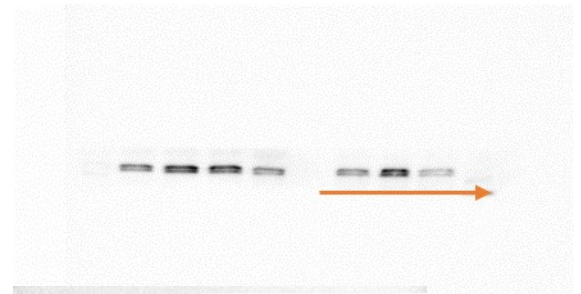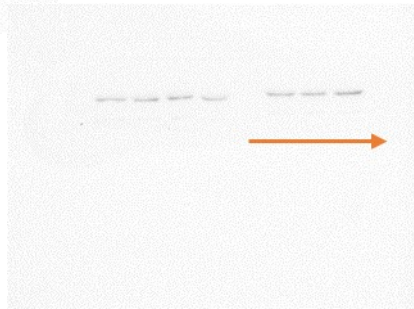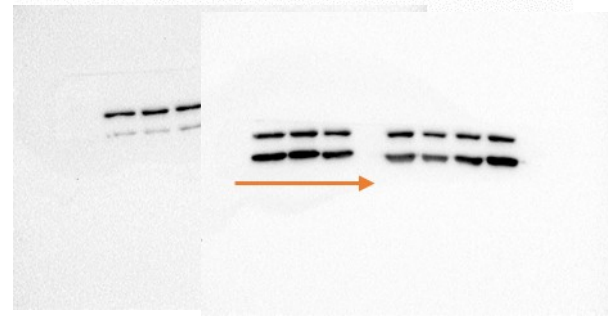

P-JNK

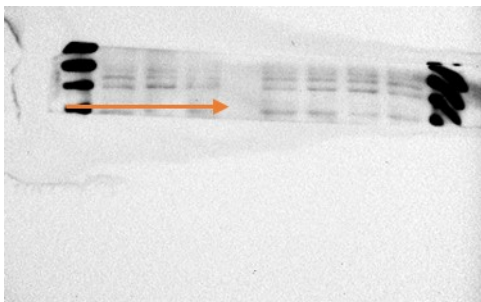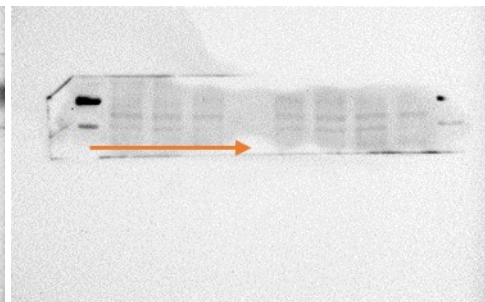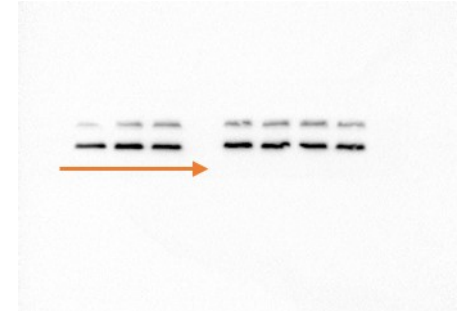

IKB

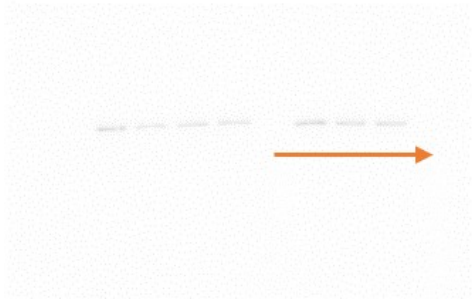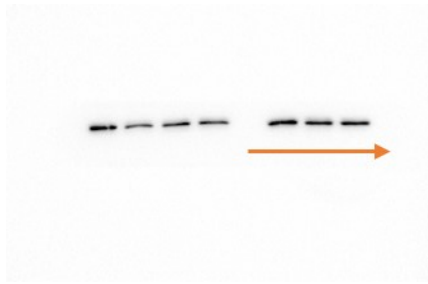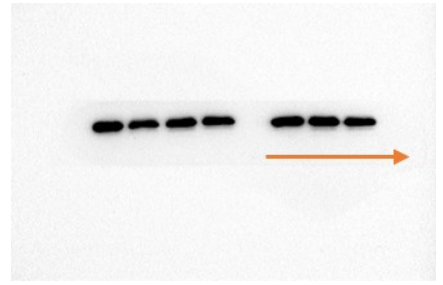

P-IKB

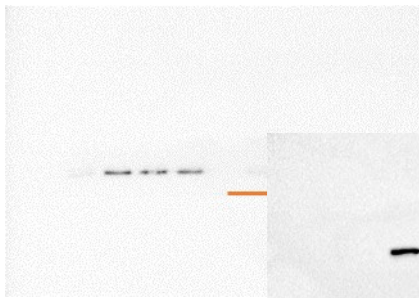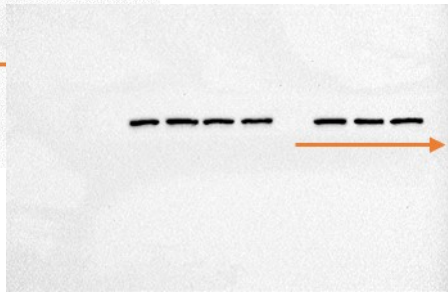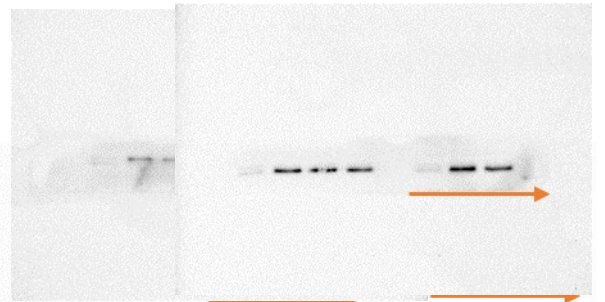

P-IKK

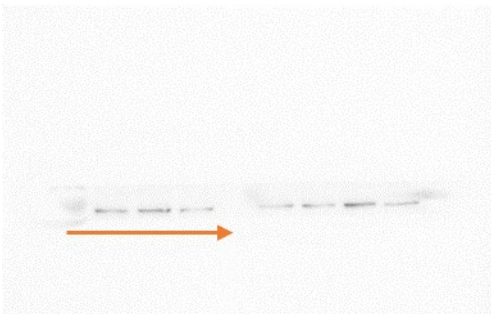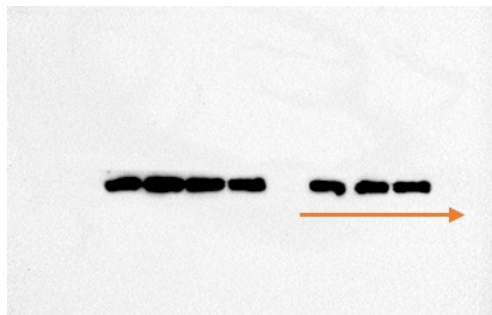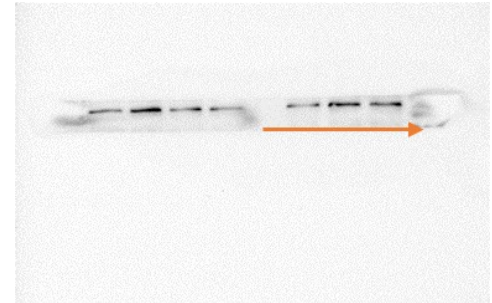

P65

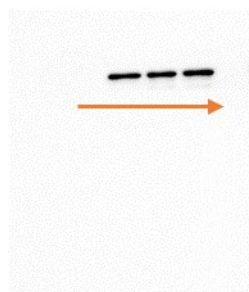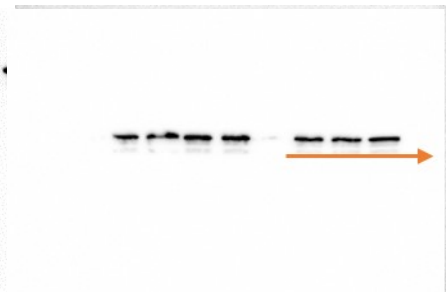

P-P65

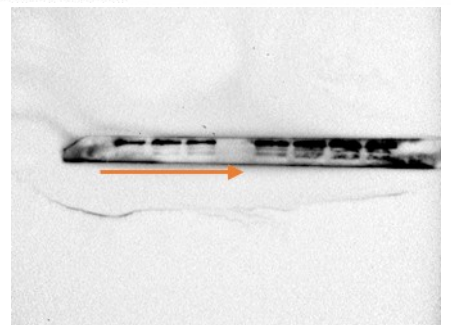

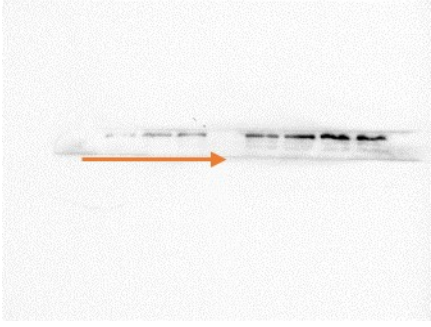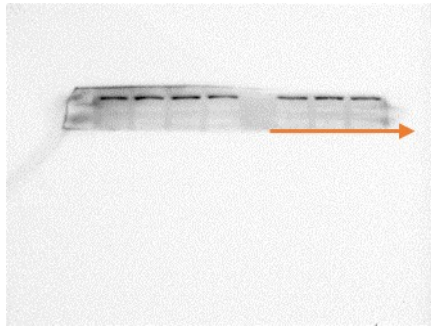

Supplement: d2fo01235a1.pdf [file d2fo01235a1.pdf]
